# Supplementary material
Source: Research Square preprint supplement (doi:10.21203/rs.3.rs-9780960/v1)
Supplement: Supplementary file 1 [file 60b2fc33751265641982c289.docx]

# **Questionnaire**

*Phone number (Caregiver /Guardian):*

*Primary care giver/Guardian’s Name* *Relationship*

*Phone number (Client):*

*Camp Section Block*

*□ Separated/Divorced*

*□ Married*

*□ Single*

*Marital Status (Client):*

*□ Widowed*

*DOB (dd/mm/yyyy) / / Place of birth-----------------*

**SECTION A: Demographic Information**

# Interviewer Name: Date of Interview: / / Camp Section: Block:

READ TO RESPONDENT: “Thank you for agreeing to participate in the interview. First, I would like to ask some questions about yourself.

| **No.** | **Question** | **Answer** | **Ski p** | |
| --- | --- | --- | --- | --- |
| **A** | **SOCIO-DEMOGRAPHIC FACTORS** | | | |
| **1** | *Marital status* | *□ Yes □ No* |  | |
| **2** | *How old are you* | *12 to 14*  *15 to 19* |  | |
| **3** | *Until you were 12 years old, did you live in Kakuma Refugee camp?* | *□ Yes □ No* |  | |
| **4** | *How long have you been living continuously in the Kakuma camp?* |  |  | |
| **5** | *Just before you moved here, where did you live?* |  |  | |
| **6** | *What is your nationality?* |  |  | |
| **7** | *What was the main reason for moving to Kenya?* | - *Join family living in Kenya.* - *Marriage* - *Work* - *School* - *Escape Insecurity/war/drought.* - *Other(s) specify* |  | |
|  | |
| 8 | Who is the head of your household? | *□Self*   - *Father* - *Mother* - *Sibling* - *Spouse*   *□ Other(s) specify* |  | |
| 10 | *Is your father Alive?* | ***□*** *Yes □ No* ***□*** *Don’t Know* |  | |
| 11 | *Is your mother Alive?* | ***□*** *Yes □ No* ***□*** *Don’t Know* |  | |
| 12 | ***Currently,*** *how many people live in your house?* | *State the exact number_------------* |  | |
| 13 | *What is your current* ***main*** *source of income for the household head?* | - *Formally employed (Specify)* - *Businessperson (Specify)* - *Casual labor* - *None (I have no source of income)*   *□Other (specify)* |  | |
| 14 | Have you done any income generating work in the last  seven days? | - *Yes* ***□****No* |  | |
| 15 | *Do you* ***currently*** *go to school?* | - *Yes* ***□****No* | |  |
| 16 | *What level of school are you at?*  ***currently*** *in?*  ***(If No—Skip to 17)*** | - *Primary level*   *Class* | |  |
| - *Secondary level*   *Form* | |
| - *Tertiary level (college/university)* | |
| - *Vocational level* | |
| *Other (specify)* | |
| 17 | *What is the* ***main*** *reason why you are not going to school?* | *Completed High School*   - *Lack of School Fees* - *Pregnancy* - *Peer Pressure* - *Not Interested* - *Awaiting to join Secondary* - *Got married.* - *Other (Specify)* | |  |
| 18 | What is your Religion? | - *Christian* - *Muslim* - *African traditional religion* - *Other (Specify)* | |  |
| 19 | *Have you* ***ever*** *been enrolled in a cash transfer program?* | *Yes □ No* ***□*** *Don’t Know* | |  |
| 20 | *Are you* ***currently*** *enrolled in any cash transfer programs?* | *Yes □ No* ***□*** *Don’t Know* | |  |
| 21 | *Which cash transfer programs are*  *you* ***currently*** *enrolled in* | *Specify* | |  |
| 22 | *In the past 4 weeks, was there any day*  *that you went without food in your household for a* ***full day*** *because of lack of resources?* | ***□*** *Yes* ***□****No* | |  |
| 23 | *For how many days did this happen in the last 4 weeks?* | - *Rarely (1-2 days)* - *Sometimes (3-10 days)*   *Often (more than 10 days)* | |  |
| B | **REPRODUCTIVE HEALTH FACTORS** | | | |
|  | **INTERVIEWER SAY:** Now I would like us to move on to some questions on your reproductive health. | | |  |
| 1 | *Do you have a biological child (children)?*  **(If NO, Skip to 3)** | *□Yes □ No* | |  |
| 2 | *How many biological children do you have?* | *Specify*  *_* | |  |
| 3 | *Are you currently pregnant?*  ***(If NO or Don’t Know skip to 10)*** | - *Yes □ No □ I don’t know* | |  |
| 4 | When you got pregnant, did you want to get pregnant at that time? | - *Yes □ No* | |  |

| 5 | When you got pregnant did you want to have a baby later on or did you not want any (more)children? | - *I wanted a baby at that time.* - *I wanted a baby later.* - *Didn’t want a baby (more children) at all* |  |
| --- | --- | --- | --- |
| 6 | Were you using any family planning method before you got pregnant? | *□Yes □ No* |  |
| 7 | Before you became pregnant …, had you stopped using all methods of birth control | *□Yes □ No* |  |
| 8 | Are SRH services available in the camp? | *Yes □ No* |  |
| 9 | What is the nature of the services | *Youth Friedly*  *Not Youth friendly* |  |
| 10 | *Are you attending ANC/PNC Clinic?* | - *Yes □ No* |  |
| 11 | *Which clinic/facility are you currently seeking ANC/PNC*  *services?* | *Specify*  *_* |  |
| 12 | *Are you aware of any family planning methods?*  ***(If NO, skip to15)*** | - *Yes □ No* |  |
| 13 | *Which family planning methods do you know of?*  **(Do NOT read responses; tick all mentioned)** | - *Pills* - *Injectable* - *Implants* - *IUCD (Coil)* - *Condom* - *Permanent (Tubal Ligation)* - *Other (Specify)* |  |
| 14 | *Are you* ***currently*** *using any modern family planning method?*  ***(If NO, Skip to 13)*** | - *Yes □ No* |  |
| 15 | *Do you know about modern family planning methods* | - *Yes □ No* |  |
| 16 | *Which family planning method are you currently using?*  **(Do NOT read responses, tick method the client mentions)** | - *Pills* - *Injections* - *Implants* - *IUCD (Coil)* - *Condom* - *Permanent (Tubal Ligation)* - *Other (Specify)* |  |
| 17 | *What’s the main reason for* ***not*** *using any family planning method?* | - *Not sexually active* - *Religious reasons* - *Cannot afford.* - *Do not know where to get.* - *Currently pregnant* - *Other (Specify)* |  |
| 18 | In the last 12 months, have you?  a) Heard about family planning at public forums, such as Barazas or | YES, NO  a) *□*Yes *□* No |  |

|  | Community Health Dialogues?  b) Seen family planning  informational material, such | b) *□*Yes |  | - No |  |  |
| --- | --- | --- | --- | --- | --- | --- |
| as posters, brochures, or stickers?   1. Been visited by a health promoter or health professional to discuss family planning issues? 2. Received family planning messages through social media platforms, such as Facebook or TikTok? 3. Received family planning messages through a mobile phone via text or email? 4. Heard political / religious / community leaders talk favorably about family planning? | c) *□*Yes |  | - No |  |
| d) *□*Yes |  | - No |  |
| e) *□*Yes |  | - No |  |
| f) *□*Yes |  | - No |  |
| g) *□*Yes |  | - No |  |
| h) *□*Yes |  | - No |  |
| 19 | In the last few months have you:   1. Heard about contraceptives on the radio? 2. Seen anything about contraceptives on the television? 3. Read about contraceptives in a newspaper or magazine? 4. Read about contraceptives on Social   media | *□*Yes  *□*Yes  *□*Yes |  | - No - No - No |  |  |
| 20 | What is the approximate distance to the nearest SRH service point? | - *<500 meters* - *500 meters-1 kilometers* - *>1 Kilometer -2 Kilometer* - *>2 Kilometer* | | | |  |
| E | **SEXUAL ACTIVITY INFORMATION** | | | | | |
| **INTERVIEWER SAY:** Now I will ask you some questions about your sexual activity in order to gain a better understanding of some life issues. Let me assure you that your answers are completely  confidential. If you are uncomfortable with any questions, please let me know. There is no right or wrong answer. Can we begin? | | | | | | |
| 1 | *How old were you when you had sex for the* ***first time****?* | *Years* | | | |  |
| 2 | *How many sexual partners have*  *you had in the* ***last 12 months****?* |  | | |  |  |
|  | | |
| 4 | *Do you have a* ***current*** *sexual partner?* | - *Yes □ No* | | | |  |
| 5 | *Is this person the same age, younger or older than you?* | - *Same Age* - *Younger* - *Older* | | | |  |
| 6 | *How often did/do you use a condom with this partner?* | - *Always* - *Sometimes* - *Never* | | | |  |
| 7 | What is the main reason you used a condom on that occasion? | - *Prevent HIV/STD* - *Avoid Pregnancy* - *Did not trust partner.* - *Partner wanted to use.* - *Other* | | | |  |
| 8 | In the last 12 months, have you ever given or received money, gifts or favors in return for sex? | 1. Yes 2. No | | | |  |
